# Supplementary material for: Combinatorial optimization of spinel Co3−xMxO4M = (Al, Ga, In) alloyed thin films prepared by ink jet printing: photoelectrochemical, optical, and structural properties
Source: Royal Society of Chemistry journal article supplement (doi:10.1039/c4ta05671j), 2015-01-01
Supplement: c4ta05671j1.pdf [file c4ta05671j1.pdf]

## Supplementary Information

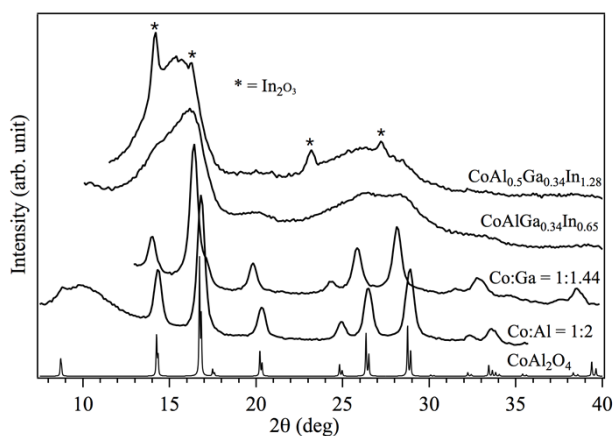

SI Fig. 1 Powder x-ray diffraction patterns for  $\text{CoAl}_2\text{O}_4$  (with literature<sup>14</sup>),  $\text{Co}_{1.56}\text{Ga}_{1.44}\text{O}_4$ ,  $\text{CoAl}_{0.5}\text{Ga}_{0.34}\text{In}_{1.28}\text{O}_4$ ,  $\text{CoAlGa}_{0.34}\text{In}_{0.65}\text{O}_4$ . The well known  $\text{CoAl}_x\text{O}_4$  and  $\text{CoGa}_x\text{O}_4$  phases<sup>14,15</sup> exhibit the spinel structure with variable Al or Ga content when  $x \leq 2$  and are fully miscible, e.g.  $\text{Co}_{3-x}(\text{Al,Ga})_x\text{O}_4$ . The expected lattice expansion is observed upon addition of Ga. The incorporation of 22 cation % In (upper middle pattern) disorders the lattice and only broad diffraction humps are observed (the broad peak near  $16^\circ$  is due to the fused silica fiber and the vacuum grease used to support the powder crystals). The upper most pattern contains 41 cation % In and phase segregated  $\text{In}_2\text{O}_3$  is detectable.
